# Supplementary material for: Detection of IP-10 protein marker in undiluted blood serum via an electrochemical E-DNA scaffold sensor
Source: Royal Society of Chemistry journal article supplement (doi:10.1039/c3an01079a), 2013-01-01
Supplement: c3an01079a.pdf [file c3an01079a.pdf]

Supporting Information for:

**Detection of IP-10 protein marker in undiluted blood serum via an electrochemical E-DNA scaffold sensor**

Andrew J. Bonham, Nicole G. Paden, Francesco Ricci, Kevin W. Plaxco

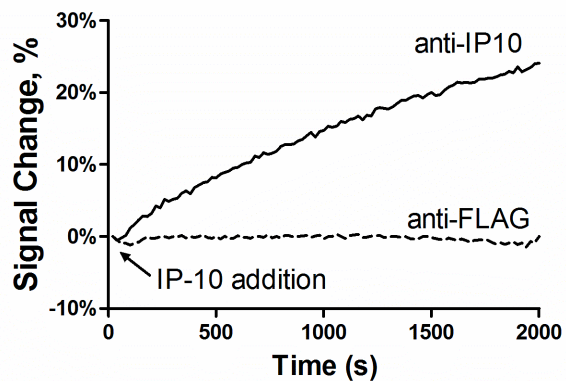

**Supporting Figure 1.** The IP-10 biosensor responds to its protein target. In contrast a negative control sensor (the anti-FLAG antibody biosensor<sup>18</sup>) show no significant response.
